# Supplementary material for: Relative importance of the mechanisms triggering the Eurasian ice sheet deglaciation
Source: Copernicus journal article supplement (doi:10.5194/egusphere-2023-34), 2023-02-10
Supplement: Supplementary file 1 [file egusphere-2023-34-supplement.pdf]

## Supplementary Information

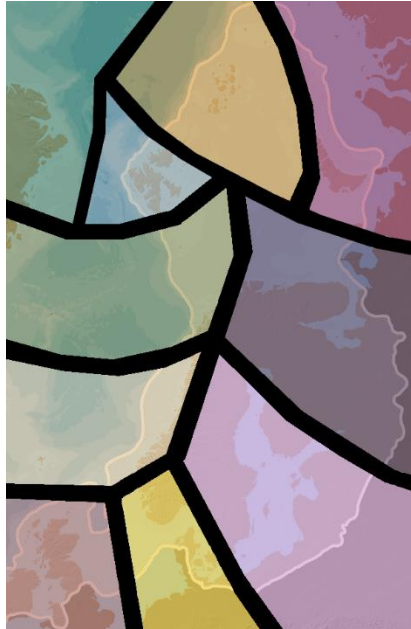

**Figure SP1:** Drainage basins used for the basal melting parameterization

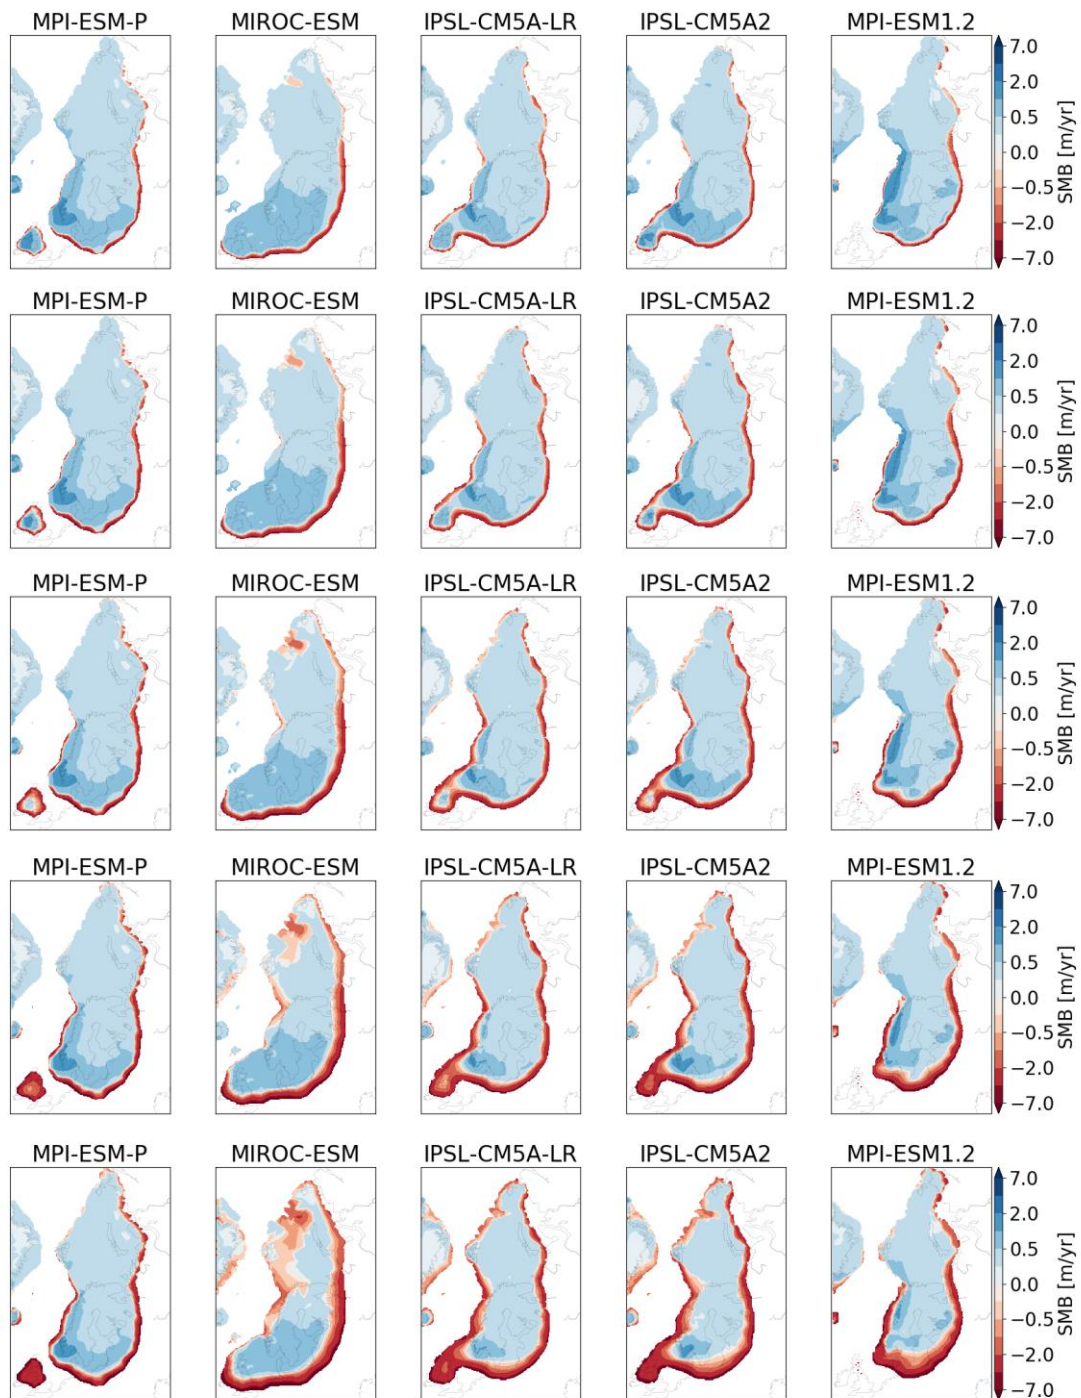

**Figure SP2:** Surface mass balance calculated with each GCM forcing for 1°C (top) to 5°C (bottom) atmospheric temperature perturbations.

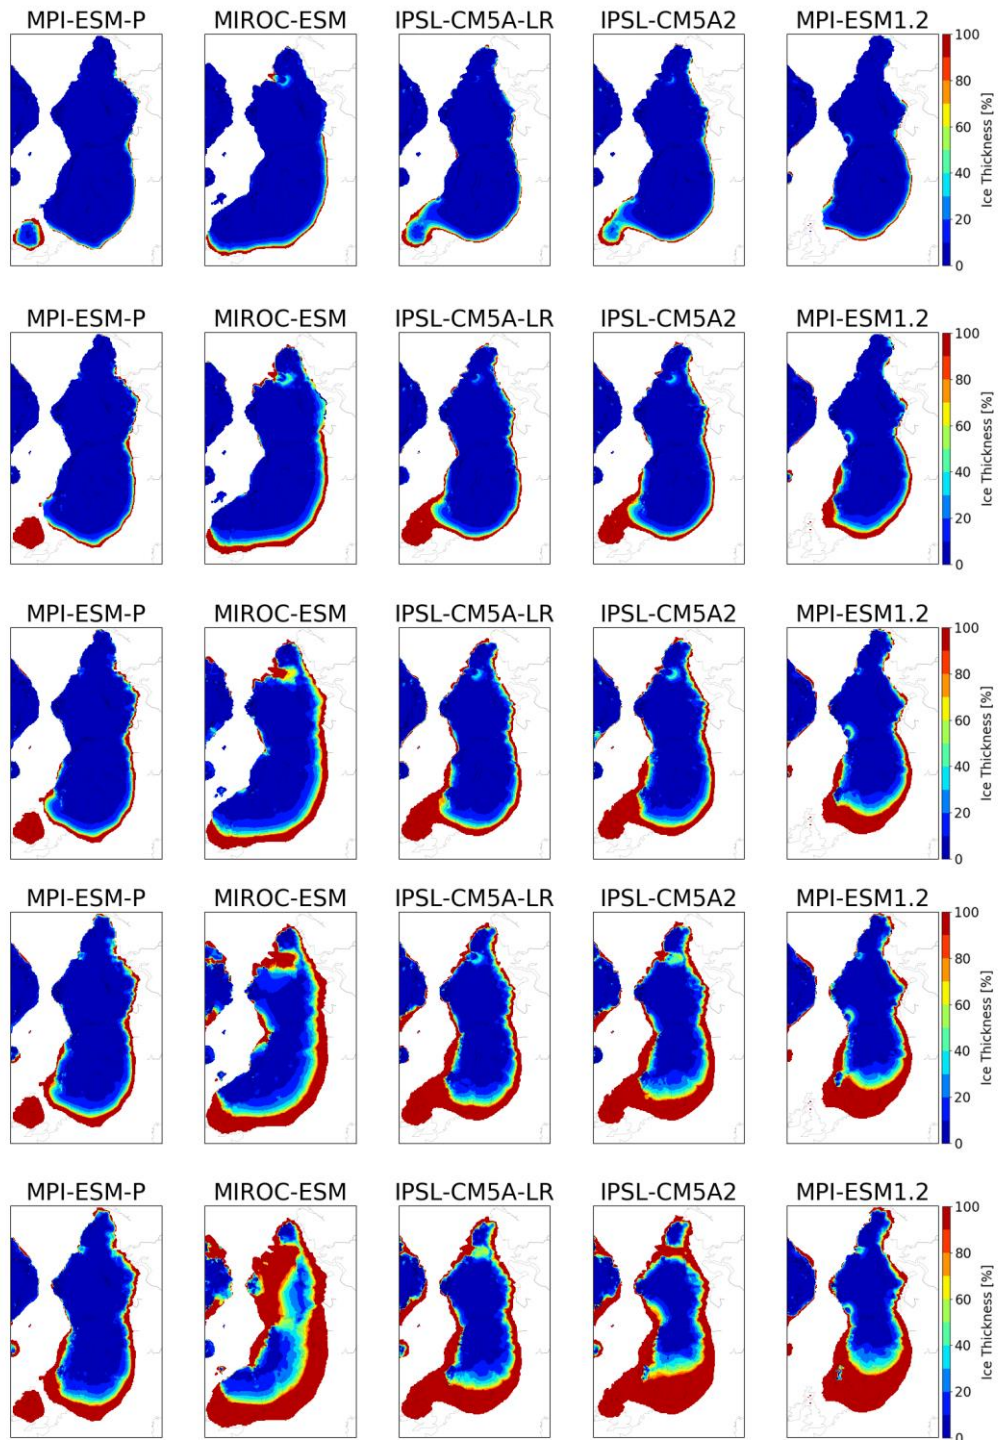

**Figure SP3:** Ice thickness lost obtained in the EXP1 experiments for each GCM forcing compared to the initial LGM ice sheet for 1°C (top) to 5°C (bottom) atmospheric temperature perturbations.

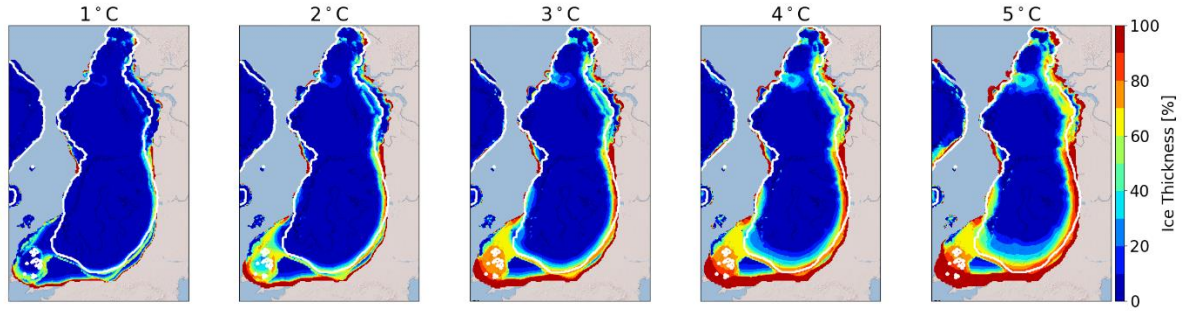

**Figure SP4:** Multi-model mean of the ice thickness lost after 1000 years compared to the initial ice sheet for the EXP2 experiments. (Red: 100% lost). White line indicates the areas where the multi-model mean is done on the 5 models.

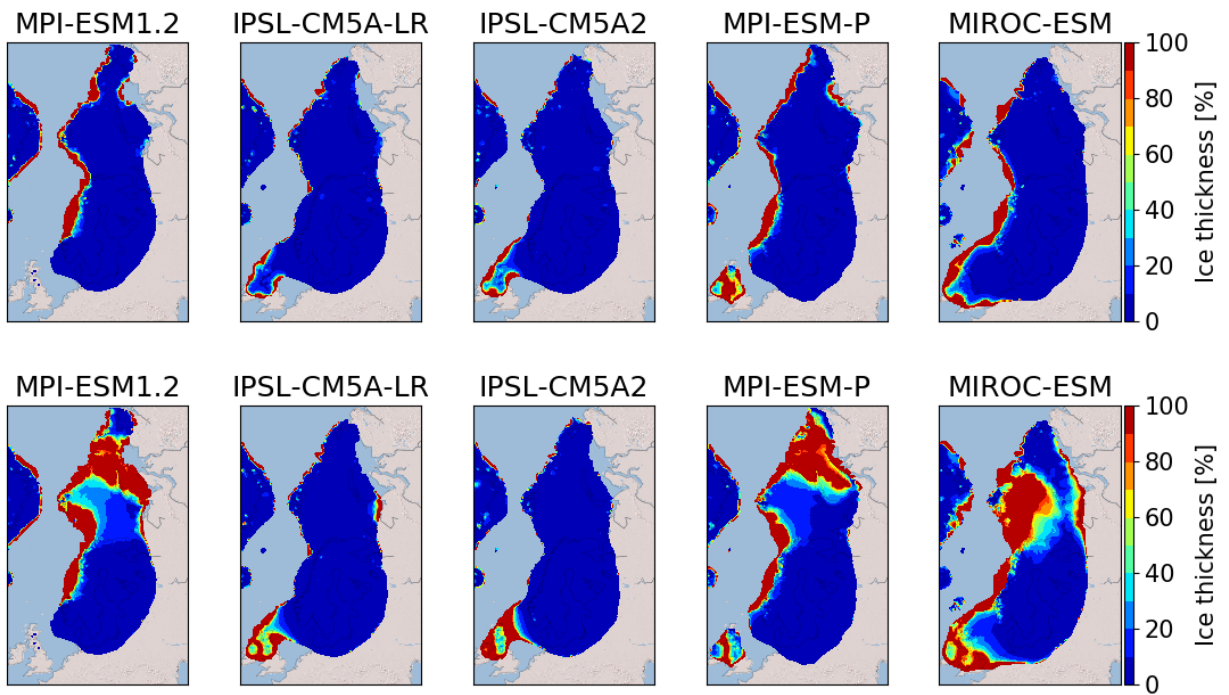

**Figure SP5:** Ice thickness lost after 1000 years (top) and 10000 years (bottom) compared to the initial ice sheet for a basal melting perturbation of  $K_t = 50 \text{ m } ^\circ\text{C}^{-1} \text{ yr}^{-1}$  for each GCM forcing. (Red 100% lost).



44  
45  
46

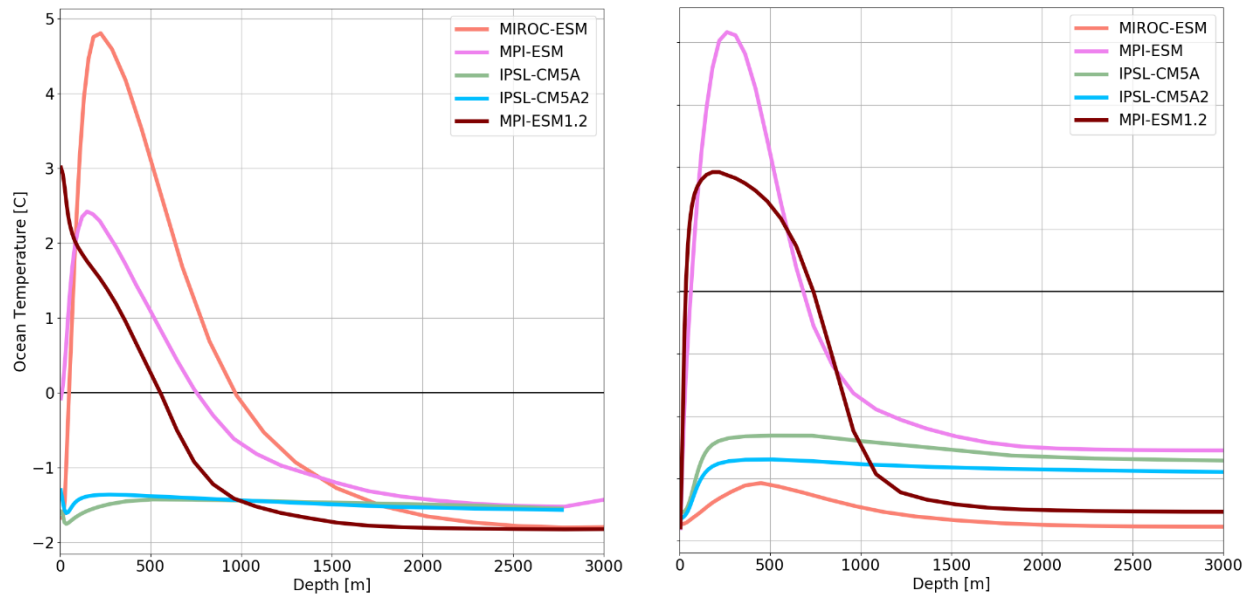

47  
48  
49  
50

**Figure SP6:** Average ocean temperature in the BJR (left) and SA sectors as a function of ocean depth.

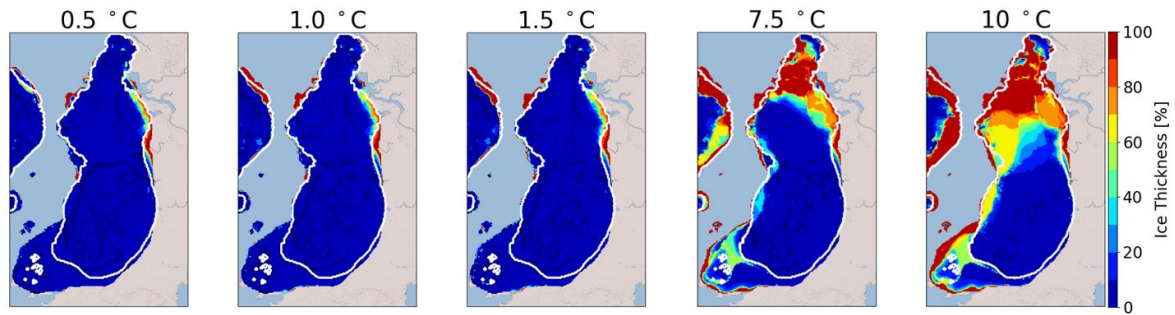

51  
52  
53  
54  
55

**Figure SP7:** Multi-model mean of the ice thickness lost after 10000 years compared to the initial ice sheet for EXP3.2. (Red: 100% lost). For this experiment,  $K_t$  has been fixed to  $7 \text{ m } ^\circ\text{C}^{-1} \text{ yr}^{-1}$ . The white line represents the most credible extent derived from the DATED-1 compilation

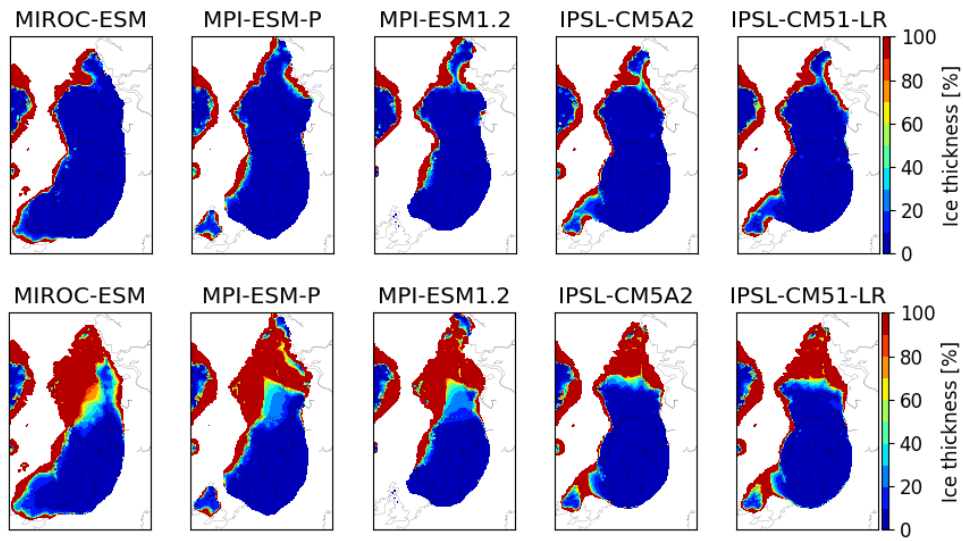

**Figure SP8:** Ice thickness lost after 1000 (top) and 10000 (bottom) model years compared to the initial LGM ice sheet for an oceanic temperature perturbation of 10°C for each GCM forcing. (Red: 100% lost).

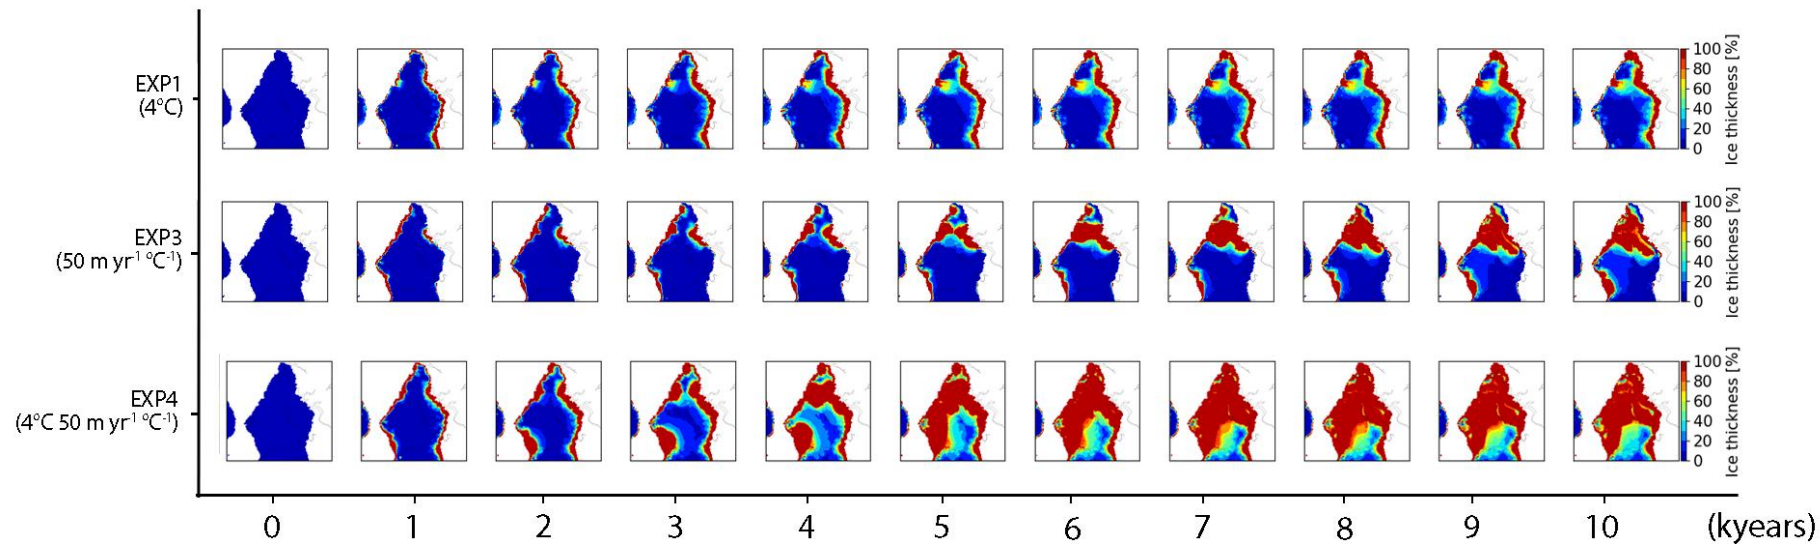

**Figure SP9:** top/ Ice thickness lost for simulation forced by MPI-ESM-P from 1000 to 10000 years with respect to the ice thickness of the LGM ice-sheet in the EXP1 (4°C) experiment Middle/ same as top/ for EXP3 (50 m °C<sup>-1</sup> yr<sup>-1</sup>). Bottom/ same as top for EXP4 (4°C and 50 m °C<sup>-1</sup> yr<sup>-1</sup>).

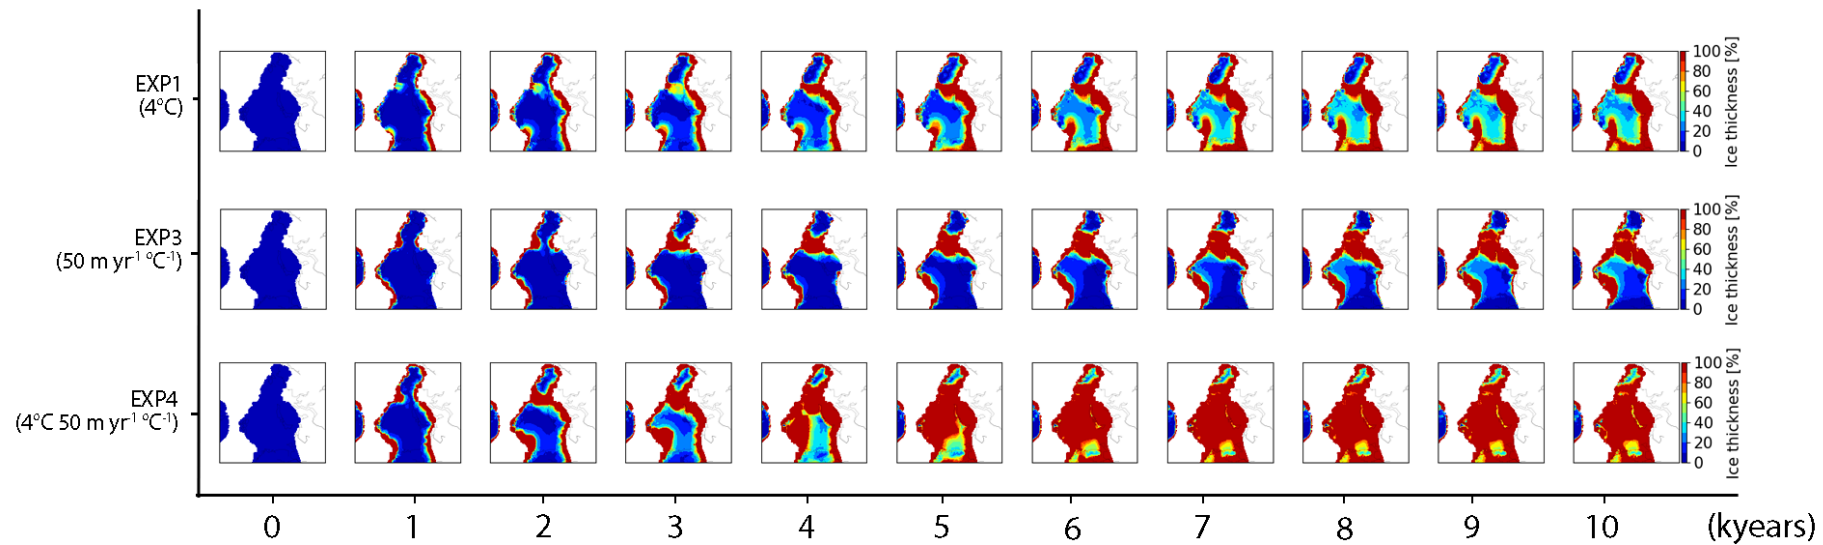

**Figure SP10:** Same as Figure SP9 for the simulation forced by MPI-ESM1.2



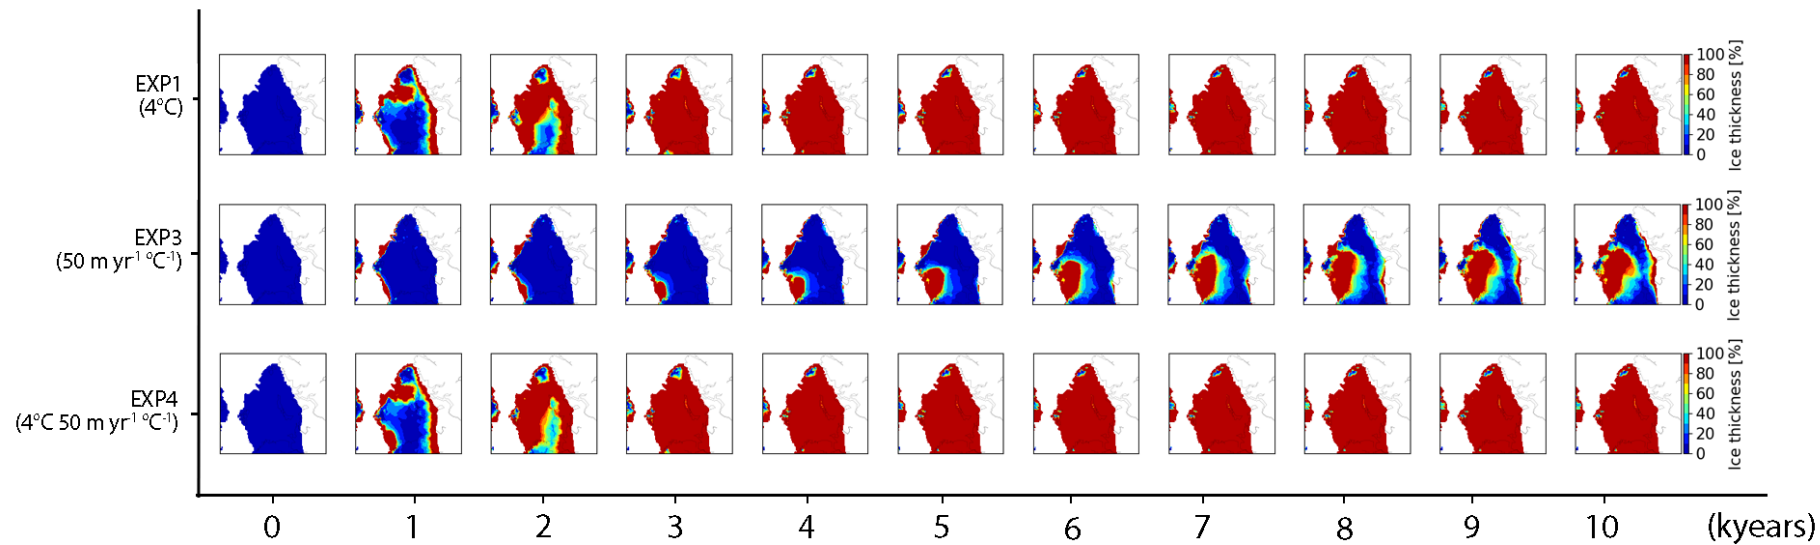

**Figure SP11:** Same as Figure SP9 for the simulation forced by MIROC-ESM.

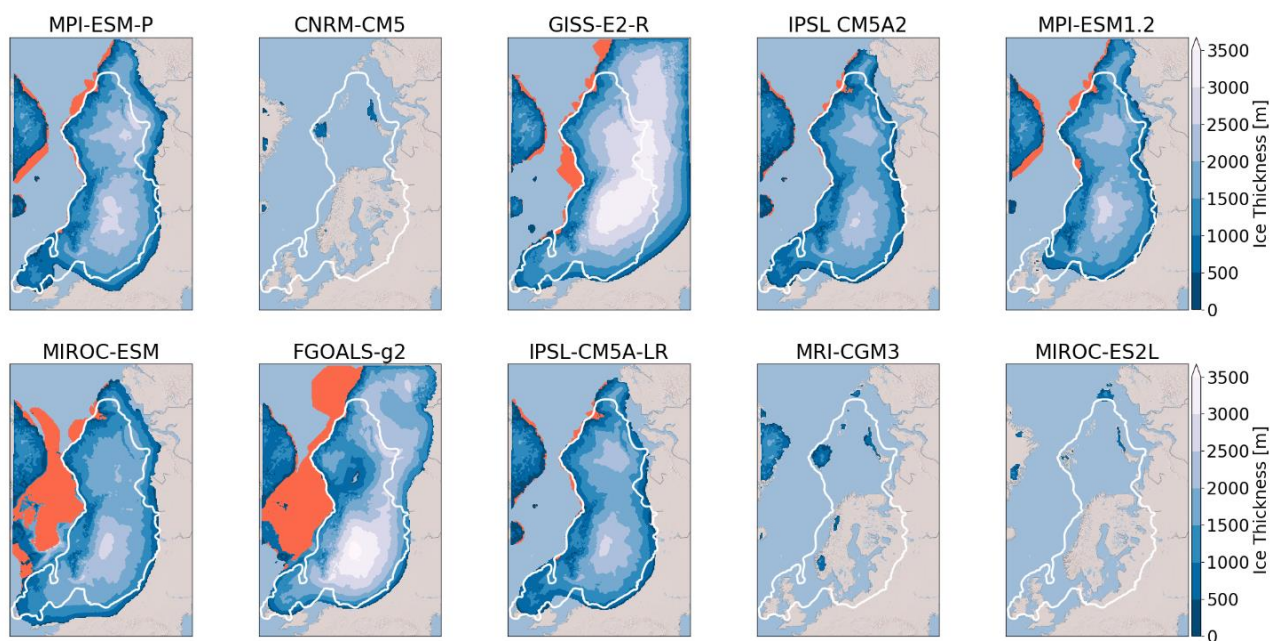

**Figure SP12:** Ice thickness at the end of the 100,000-year LGM simulation (spin-up) for the different GCMs used as inputs to GRISLI. Basal melting is set to  $0.1 \text{ m yr}^{-1}$  as in Petrini et al., (2020). The white line is the most credible extent derived from the DATED-1 compilation and the orange areas are the simulated ice shelves.
